# Supplementary material
Source: PubMed Central journal article supplement (PMC3445664)
Supplement: NIHMS382638-supplement-02.pdf [file NIHMS382638-supplement-02.pdf]

Supplementary Fig. 2

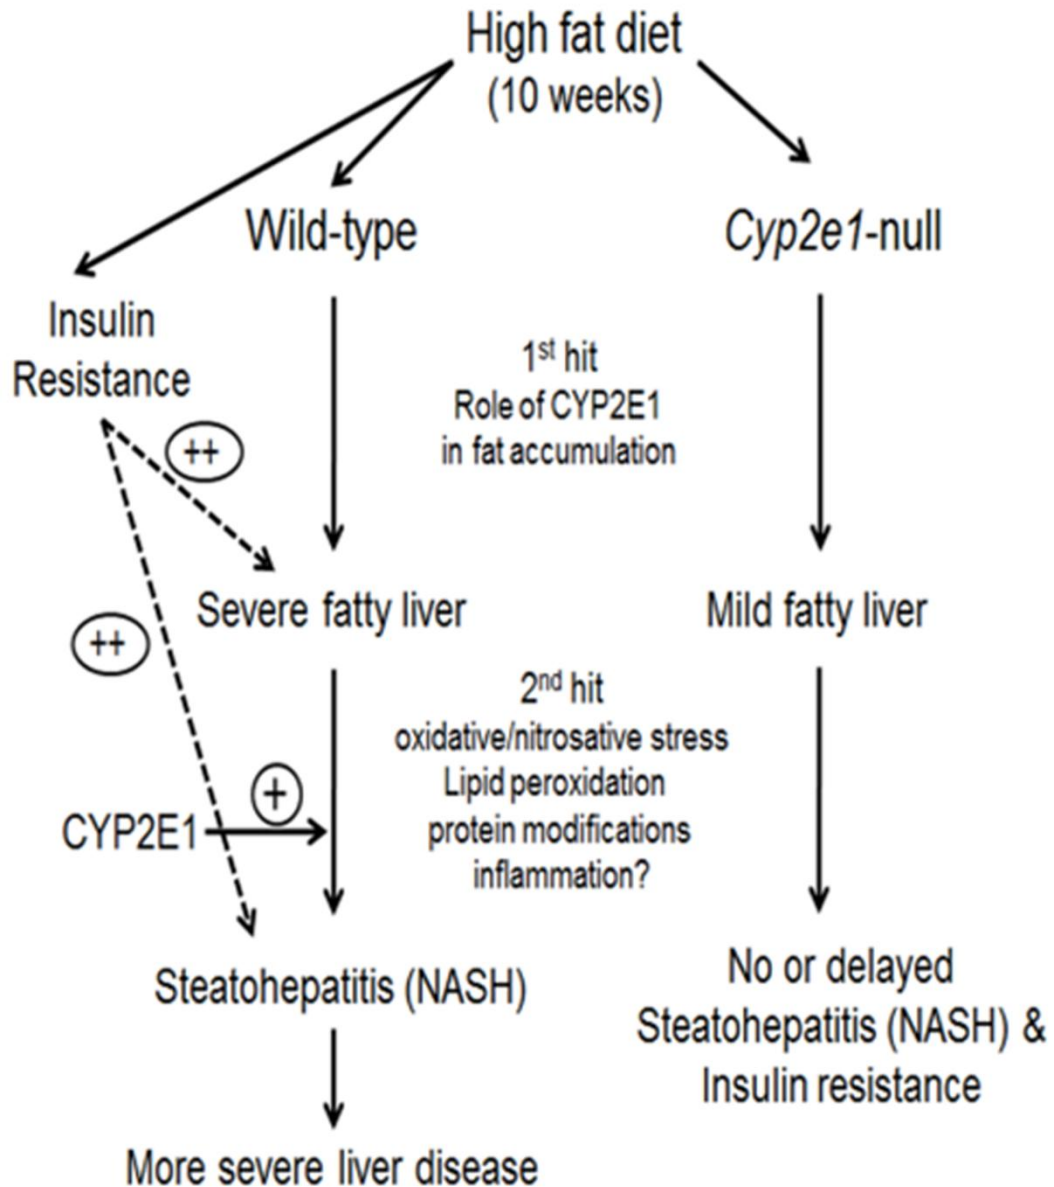

**Supplementary Fig. 2. Schematic diagram for the role of CYP2E1 in NASH development.** The first and second hits for the development of NASH in HFD-exposed WT are presented. CYP2E1 appears to have a critical role in fat accumulation and the development of NASH in HFD-fed WT mice through increased oxidative/nitrosative stress, lipid peroxidation, protein modifications, inflammation and insulin resistance.
